# Supplementary material for: The Gut Microbial Composition Is Species-Specific and Individual-Specific in Two Species of Estrildid Finches, the Bengalese Finch and the Zebra Finch
Source: Front Microbiol. 2021 Feb 19;12:619141. doi: 10.3389/fmicb.2021.619141 (PMC7933042; doi:10.3389/fmicb.2021.619141)
Supplement: Supplementary Table 3 — Detailed information on the differentially abundant microbial taxa in the zebra finches and the Bengalese finches. [file Table_3.XLSX]

## Sheet: S3
OTU_ID	base_Mean	log2FoldChange	lfcSE	stat	pvalue	padj	Kingdom	Phylum	Class	Order	Family	Genus
OTU025	133.941	8.704	0.472573	18.4183	9.37e-76	1.99e-73	Bacteria	Actinobacteriota	Actinobacteria	Micrococcales	Micrococcales_unclassified	Micrococcales_unclassified
OTU068	10.0076	6.41748	0.496494	12.9256	3.23e-38	3.44e-36	Bacteria	Actinobacteriota	Actinobacteria	Actinobacteria_unclassified	Actinobacteria_unclassified	Actinobacteria_unclassified
OTU019	202.234	10.4046	0.865283	12.0245	2.64e-33	1.88e-31	Bacteria	Actinobacteriota	Coriobacteriia	Coriobacteriales	Atopobiaceae	Atopobium
OTU009	554.444	4.35349	0.37393	11.6425	2.5e-31	1.33e-29	Bacteria	Firmicutes	Bacilli	Lactobacillales	Lactobacillaceae	Lactobacillus
OTU005	2720.08	4.58859	0.450958	10.1752	2.56e-24	1.09e-22	Bacteria	Proteobacteria	Gammaproteobacteria	Enterobacterales	Enterobacteriaceae	Kosakonia
OTU050	18.4236	4.95241	0.491717	10.0717	7.37e-24	2.62e-22	Bacteria	Actinobacteriota	Actinobacteria	Micrococcales	Microbacteriaceae	Curtobacterium
OTU012	449.297	4.32724	0.434416	9.96105	2.26e-23	6.87e-22	Bacteria	Firmicutes	Bacilli	Lactobacillales	Leuconostocaceae	Weissella
OTU007	1445.4	3.32148	0.348865	9.52083	1.72e-21	4.07e-20	Bacteria	Firmicutes	Bacilli	Lactobacillales	Leuconostocaceae	Weissella
OTU006	1503.56	4.02764	0.425144	9.47358	2.7e-21	5.76e-20	Bacteria	Actinobacteriota	Actinobacteria	Bifidobacteriales	Bifidobacteriaceae	Bifidobacteriaceae_unclassified
OTU040	10.4598	5.714	0.606656	9.41884	4.56e-21	8.83e-20	Bacteria	Firmicutes	Bacilli	Lactobacillales	Streptococcaceae	Streptococcus
OTU038	24.3942	6.88254	0.732059	9.40161	5.37e-21	9.54e-20	Bacteria	Firmicutes	Bacilli	Lactobacillales	Lactobacillales_unclassified	Lactobacillales_unclassified
OTU027	74.597	5.23021	0.585311	8.93577	4.04e-19	6.62e-18	Bacteria	Proteobacteria	Gammaproteobacteria	Pseudomonadales	Pseudomonadaceae	Pseudomonas
OTU029	55.6535	3.83448	0.429503	8.9277	4.35e-19	6.62e-18	Bacteria	Firmicutes	Bacilli	Lactobacillales	Streptococcaceae	Lactococcus
OTU028	10.5887	7.02739	0.789036	8.9063	5.28e-19	7.49e-18	Bacteria	Campilobacterota	Campylobacteria	Campylobacterales	Helicobacteraceae	Helicobacter
OTU037	14.2231	4.65151	0.528574	8.80011	1.37e-18	1.82e-17	Bacteria	Firmicutes	Bacilli	Lactobacillales	Streptococcaceae	Lactococcus
OTU023	116.507	5.03021	0.589947	8.52655	1.51e-17	1.89e-16	Bacteria	Proteobacteria	Gammaproteobacteria	Pseudomonadales	Pseudomonadaceae	Pseudomonas
OTU057	4.16669	4.11973	0.503782	8.17761	2.9e-16	3.43e-15	Bacteria	Proteobacteria	Gammaproteobacteria	Burkholderiales	Comamonadaceae	Delftia
OTU044	11.6966	4.65862	0.574366	8.11088	5.03e-16	5.63e-15	Bacteria	Proteobacteria	Gammaproteobacteria	Enterobacterales	Enterobacterales_unclassified	Enterobacterales_unclassified
OTU022	112.26	4.88391	0.626763	7.79228	6.58e-15	7.01e-14	Bacteria	Proteobacteria	Gammaproteobacteria	Pasteurellales	Pasteurellaceae	Pasteurellaceae_unclassified
OTU017	204.105	3.375	0.441324	7.64744	2.05e-14	2.08e-13	Bacteria	Proteobacteria	Gammaproteobacteria	Enterobacterales	Enterobacteriaceae	Enterobacteriaceae_unclassified
OTU024	36.6607	3.82353	0.520013	7.35276	1.94e-13	1.88e-12	Bacteria	Firmicutes	Bacilli	Lactobacillales	Enterococcaceae	Enterococcus
OTU030	47.3993	4.74796	0.655528	7.24295	4.39e-13	4.07e-12	Bacteria	Proteobacteria	Gammaproteobacteria	Pseudomonadales	Moraxellaceae	Acinetobacter
OTU053	9.17391	3.26988	0.46007	7.10736	1.18e-12	1.05e-11	Bacteria	Actinobacteriota	Actinobacteria	Micrococcales	Microbacteriaceae	Microbacteriaceae_unclassified
OTU062	10.9584	4.37122	0.616651	7.08865	1.35e-12	1.15e-11	Bacteria	Proteobacteria	Gammaproteobacteria	Pseudomonadales	Moraxellaceae	Enhydrobacter
OTU093	1.70395	4.39462	0.629239	6.98403	2.87e-12	2.35e-11	Bacteria	Actinobacteriota	Actinobacteria	Pseudonocardiales	Pseudonocardiaceae	Saccharopolyspora
OTU004	5167.79	2.73503	0.391985	6.97739	3.01e-12	2.37e-11	Bacteria	Firmicutes	Bacilli	Lactobacillales	Lactobacillaceae	Lactobacillus
OTU035	21.5091	2.77032	0.400926	6.90981	4.85e-12	3.69e-11	Bacteria	Firmicutes	Bacilli	Staphylococcales	Staphylococcaceae	Staphylococcus
OTU026	22.1097	4.29263	0.649885	6.60522	3.97e-11	2.92e-10	Bacteria	Proteobacteria	Gammaproteobacteria	Pseudomonadales	Pseudomonadaceae	Pseudomonas
OTU014	459.451	3.06709	0.465483	6.58905	4.43e-11	3.14e-10	Bacteria	Proteobacteria	Gammaproteobacteria	Enterobacterales	Erwiniaceae	Pantoea
OTU079	4.40121	3.60945	0.594453	6.07188	1.26e-09	7.92e-09	Bacteria	Actinobacteriota	Actinobacteria	Propionibacteriales	Propionibacteriaceae	Cutibacterium
OTU039	12.3973	3.79861	0.663494	5.72517	1.03e-08	6.29e-08	Bacteria	Proteobacteria	Gammaproteobacteria	Pseudomonadales	Pseudomonadaceae	Pseudomonas
OTU073	3.29717	4.93935	0.875352	5.6427	1.67e-08	9.9e-08	Bacteria	Firmicutes	Bacilli	Lactobacillales	Leuconostocaceae	Leuconostoc
OTU094	1.70316	2.8811	0.5538	5.20241	1.97e-07	1.13e-06	Bacteria	Proteobacteria	Alphaproteobacteria	Rhizobiales	Rhizobiaceae	Ochrobactrum
OTU058	3.30732	5.03407	0.972812	5.17476	2.28e-07	1.28e-06	Bacteria	Firmicutes	Clostridia	Clostridiales	Clostridiaceae	Clostridium_sensu_stricto_1
OTU103	1.50521	2.94109	0.574125	5.12273	3.01e-07	1.64e-06	Bacteria	Proteobacteria	Gammaproteobacteria	Burkholderiales	Comamonadaceae	Pelomonas
OTU088	2.6232	2.71819	0.531079	5.11824	3.08e-07	1.64e-06	Bacteria	Actinobacteriota	Actinobacteria	Micrococcales	Micrococcaceae	Kocuria
OTU099	1.15913	3.64914	0.733548	4.97464	6.54e-07	3.4e-06	Bacteria	Firmicutes	Bacilli	Lactobacillales	Carnobacteriaceae	Carnobacterium
OTU069	2.63248	3.73811	0.759239	4.92349	8.5e-07	4.31e-06	Bacteria	Proteobacteria	Gammaproteobacteria	Pseudomonadales	Moraxellaceae	Acinetobacter
OTU087	4.46878	4.46235	0.923494	4.83203	1.35e-06	6.42e-06	Bacteria	Firmicutes	Bacilli	Paenibacillales	Paenibacillaceae	Paenibacillus
OTU071	3.35635	2.63361	0.545107	4.83136	1.36e-06	6.42e-06	Bacteria	Proteobacteria	Alphaproteobacteria	Rhizobiales	Rhizobiaceae	Allorhizobium-Neorhizobium-Pararhizobium-Rhizobium
OTU021	177.579	1.2683	0.262521	4.83125	1.36e-06	6.42e-06	Bacteria	Actinobacteriota	Actinobacteria	Micrococcales	Micrococcaceae	Rothia
OTU111	1.48426	3.24992	0.677766	4.79505	1.63e-06	7.53e-06	Bacteria	Proteobacteria	Alphaproteobacteria	Rhizobiales	Beijerinckiaceae	Methylobacterium-Methylorubrum
OTU020	18.6611	3.51995	0.735706	4.78445	1.71e-06	7.77e-06	Bacteria	Proteobacteria	Gammaproteobacteria	Enterobacterales	Enterobacteriaceae	Escherichia-Shigella
OTU013	244.029	2.50831	0.526785	4.76154	1.92e-06	8.53e-06	Bacteria	Proteobacteria	Gammaproteobacteria	Enterobacterales	Enterobacteriaceae	Cronobacter
OTU106	4.36147	3.54836	0.751964	4.71879	2.37e-06	1.03e-05	Bacteria	Firmicutes	Bacilli	Lactobacillales	Lactobacillaceae	Lactobacillus
OTU083	2.22648	4.47974	0.956882	4.6816	2.85e-06	1.21e-05	Bacteria	Firmicutes	Bacilli	Bacillales	Planococcaceae	Planococcaceae_unclassified
OTU109	1.43021	3.91404	0.839999	4.65957	3.17e-06	1.29e-05	Bacteria	Actinobacteriota	Actinobacteria	Micrococcales	Sanguibacteraceae	Sanguibacter
OTU065	4.905	3.06174	0.657394	4.6574	3.2e-06	1.29e-05	Bacteria	Actinobacteriota	Actinobacteria	Micrococcales	Micrococcaceae	Kocuria
OTU096	2.08715	2.84505	0.621221	4.57977	4.65e-06	1.84e-05	Bacteria	Firmicutes	Bacilli	Lactobacillales	Leuconostocaceae	Leuconostoc
OTU070	1.5158	4.32003	0.945158	4.57069	4.86e-06	1.88e-05	Bacteria	Firmicutes	Bacilli	Lactobacillales	Streptococcaceae	Streptococcus
OTU054	4.60151	5.82723	1.281	4.54896	5.39e-06	2.05e-05	Bacteria	Firmicutes	Clostridia	Clostridiales	Clostridiaceae	Candidatus_Arthromitus
OTU033	21.616	1.34269	0.304289	4.41254	1.02e-05	3.82e-05	Bacteria	Firmicutes	Bacilli	Lactobacillales	Streptococcaceae	Streptococcus
OTU108	1.54802	2.86133	0.656183	4.36056	1.3e-05	4.76e-05	Bacteria	Actinobacteriota	Actinobacteria	Corynebacteriales	Corynebacteriaceae	Corynebacterium
OTU097	1.54093	3.14676	0.734109	4.28651	1.82e-05	6.55e-05	Bacteria	Proteobacteria	Gammaproteobacteria	Enterobacterales	Enterobacteriaceae	Enterobacteriaceae_unclassified
OTU129	0.901479	3.16485	0.785751	4.0278	5.63e-05	0.00019659	Bacteria	Firmicutes	Bacilli	Lactobacillales	Lactobacillaceae	Lactobacillus
OTU122	1.3549	2.44767	0.609372	4.0167	5.9e-05	0.000202755	Bacteria	Proteobacteria	Alphaproteobacteria	Caulobacterales	Caulobacteraceae	Brevundimonas
OTU126	1.02427	3.07517	0.785948	3.91269	9.13e-05	0.000308591	Bacteria	Proteobacteria	Alphaproteobacteria	Rhizobiales	Beijerinckiaceae	Methylobacterium-Methylorubrum
OTU061	0.719468	2.42826	0.643662	3.77257	0.000161572	0.000537732	Bacteria	Proteobacteria	Alphaproteobacteria	Sphingomonadales	Sphingomonadaceae	Sphingomonas
OTU092	1.25207	2.98838	0.813135	3.67513	0.000237726	0.000779011	Bacteria	Firmicutes	Bacilli	Paenibacillales	Paenibacillaceae	Paenibacillus
OTU047	1.89613	2.97852	0.814101	3.65866	0.000253541	0.000818244	Bacteria	Proteobacteria	Gammaproteobacteria	Enterobacterales	Yersiniaceae	Serratia
OTU049	4.27074	3.34791	0.92081	3.63583	0.000277085	0.000880881	Bacteria	Proteobacteria	Gammaproteobacteria	Pseudomonadales	Moraxellaceae	Acinetobacter
OTU102	1.64366	2.27505	0.637339	3.5696	0.000357526	0.0011199	Bacteria	Actinobacteriota	Actinobacteria	Micrococcales	Micrococcaceae	Micrococcus
OTU086	2.09219	4.03695	1.13808	3.54715	0.00038942	0.00120212	Bacteria	Firmicutes	Bacilli	Bacillales	Bacillaceae	Bacillus
OTU016	211.574	1.99761	0.567346	3.52097	0.000429973	0.00130835	Bacteria	Firmicutes	Bacilli	Lactobacillales	Enterococcaceae	Enterococcus
OTU080	0.817734	2.21933	0.644296	3.44457	0.000571963	0.00171589	Bacteria	Firmicutes	Bacilli	Lactobacillales	Lactobacillaceae	Lactobacillus
OTU059	5.02469	2.55474	0.759279	3.36469	0.000766291	0.00226694	Bacteria	Proteobacteria	Gammaproteobacteria	Enterobacterales	Enterobacterales_unclassified	Enterobacterales_unclassified
OTU123	0.677262	2.86028	0.878863	3.25452	0.00113583	0.00331414	Bacteria	Actinobacteriota	Actinobacteria	Pseudonocardiales	Pseudonocardiaceae	Saccharopolyspora
OTU085	1.41069	3.02919	0.943571	3.21035	0.00132574	0.00381599	Bacteria	Proteobacteria	Gammaproteobacteria	Pseudomonadales	Moraxellaceae	Moraxella
OTU063	5.74464	3.0073	0.948471	3.17068	0.00152083	0.00431916	Bacteria	Proteobacteria	Gammaproteobacteria	Enterobacterales	Erwiniaceae	Erwiniaceae_unclassified
OTU081	0.635581	2.37643	0.760822	3.12351	0.0017871	0.00500857	Bacteria	Proteobacteria	Gammaproteobacteria	Xanthomonadales	Xanthomonadaceae	Stenotrophomonas
OTU002	14128.2	0.692992	0.229659	3.01748	0.00254883	0.00696027	Bacteria	Firmicutes	Bacilli	Lactobacillales	Lactobacillaceae	Lactobacillus
OTU148	0.841118	2.72268	0.914719	2.97652	0.00291541	0.00786054	Bacteria	Proteobacteria	Gammaproteobacteria	Burkholderiales	Neisseriaceae	Neisseriaceae_unclassified
OTU151	1.25589	2.83477	0.956656	2.96321	0.00304453	0.00810607	Bacteria	Actinobacteriota	Actinobacteria	Corynebacteriales	Nocardiaceae	Rhodococcus
OTU150	0.63104	2.43759	0.82506	2.95444	0.00313237	0.00823698	Bacteria	Proteobacteria	Alphaproteobacteria	Rhizobiales	Beijerinckiaceae	Methylobacterium-Methylorubrum
OTU101	0.799833	-2.88561	0.930068	-3.10258	0.00191839	0.00530673	Bacteria	Actinobacteriota	Actinobacteria	Corynebacteriales	Corynebacteriales_unclassified	Corynebacteriales_unclassified
OTU045	1.68712	-4.32371	1.06988	-4.0413	5.32e-05	0.000188706	Bacteria	Spirochaetota	Brachyspirae	Brachyspirales	Brachyspiraceae	Brachyspira
OTU042	7.38872	-2.38684	0.511138	-4.66966	3.02e-06	1.26e-05	Bacteria	Proteobacteria	Alphaproteobacteria	Rhodobacterales	Rhodobacteraceae	Paracoccus
OTU089	1.37488	-2.36787	0.38885	-6.08943	1.13e-09	7.31e-09	Bacteria	Firmicutes	Bacilli	Lactobacillales	Lactobacillales_unclassified	Lactobacillales_unclassified
OTU008	421.099	-3.34246	0.516063	-6.47684	9.37e-11	6.23e-10	Bacteria	Firmicutes	Bacilli	Lactobacillales	Lactobacillaceae	Lactobacillus
OTU055	2.50316	-3.72123	0.567874	-6.55291	5.64e-11	3.88e-10	Bacteria	Firmicutes	Bacilli	Lactobacillales	Streptococcaceae	Streptococcus
OTU052	3.51385	-4.71249	0.477473	-9.86964	5.64e-23	1.5e-21	Bacteria	Campilobacterota	Campylobacteria	Campylobacterales	Helicobacteraceae	Helicobacter
